# Supplementary material for: Modeling HIV-1 Drug Resistance as Episodic Directional Selection
Source: PLoS Comput Biol. 2012 May 10;8(5):e1002507. doi: 10.1371/journal.pcbi.1002507 (PMC3349733; doi:10.1371/journal.pcbi.1002507)
Supplement: Table S1 — Reverse transcriptase results - DEPS. (PDF) [file pcbi.1002507.s004.pdf]

## Reverse transcriptase results - DEPS

| Site | AA | Bayes factor | Resistance      |
|------|----|--------------|-----------------|
| 39   | T  | 3610.3       |                 |
| 48   | T  | 3558.6       |                 |
| 49   | R  | 5715.3       |                 |
| 60   | I  | 416.3        |                 |
| 69   | D  | 223.3        | NRTI accessory  |
| 83   | K  | 211.7        |                 |
| 98   | S  | $> 10^5$     |                 |
| 100  | I  | 148.2        | NNRTI Major     |
| 102  | Q  | 153.2        |                 |
| 103  | N  | $> 10^5$     | NNRTI Major     |
| 116  | Y  | 317.9        | NRTI            |
| 121  | H  | $> 10^5$     |                 |
| 121  | Y  | $> 10^5$     |                 |
| 122  | E  | 3991         |                 |
| 122  | P  | $> 10^5$     |                 |
| 135  | T  | $> 10^5$     | NNRTI accessory |
| 142  | T  | 4078.6       |                 |
| 158  | S  | 3316.8       |                 |
| 162  | C  | $> 10^5$     |                 |
| 165  | I  | 852          |                 |
| 166  | R  | 1036         |                 |
| 169  | D  | $> 10^5$     |                 |
| 171  | Y  | 665.7        |                 |
| 178  | M  | 386.4        |                 |
| 179  | D  | 116.5        | NNRTI           |
| 181  | C  | 102.5        | NNRTI Major     |
| 184  | V  | $> 10^5$     | NRTI Major      |
| 188  | L  | $> 10^5$     | NNRTI Major     |
| 195  | L  | 126.6        |                 |
| 196  | E  | $> 10^5$     |                 |
| 207  | E  | 444.9        |                 |
| 207  | Q  | 2162.6       |                 |
| 211  | K  | 1167.1       |                 |
| 214  | L  | $> 10^5$     |                 |
| 230  | L  | 374.2        | NNRTI Major     |
| 243  | H  | 271          |                 |
| 245  | E  | $> 10^5$     |                 |
| 245  | M  | 490.4        |                 |
| 245  | Q  | $> 10^5$     |                 |
| 272  | A  | $> 10^5$     |                 |
| 272  | P  | $> 10^5$     |                 |
| 277  | R  | 2872.6       |                 |
| 286  | A  | $> 10^5$     |                 |
| 288  | S  | $> 10^5$     |                 |
| 296  | S  | 520.3        |                 |
| 297  | K  | 132.3        |                 |
