# Supplementary material for: Modeling HIV-1 Drug Resistance as Episodic Directional Selection
Source: PLoS Comput Biol. 2012 May 10;8(5):e1002507. doi: 10.1371/journal.pcbi.1002507 (PMC3349733; doi:10.1371/journal.pcbi.1002507)
Supplement: Text S1 — Simulation details. The variation in nuisance parameters used for our simulations. (PDF) [file pcbi.1002507.s013.pdf]

*Simulation details.* We ran 4 simulations for MEDS. We used equal nucleotide substitution rates ( $\theta_{ij} = 1$ ), and equal target nucleotide frequency parameters ( $\pi_{ij} = 0.25$ ). The  $t$  parameter (as in  $e^{Qt}$ ) for every branch was set to 0.05. We also needed to choose the synonymous rate  $\alpha$ , the background non-synonymous rate  $\beta^B$ , and the foreground non-synonymous rate  $\beta^F$ . We let each of these be either 0.2 or 1, simulating sites with all possible combinations of these parameters. For example, if  $\alpha = 0.2$ ,  $\beta^B = 0.2$  but  $\beta^F = 1$ , we would have neutral selection on the background and diversifying selection on the foreground.  $\omega_T$  assumed one of 5 values (2, 5, 10, 100, 1000), also described in the main text. An example of a balanced phylogenies used, along with the location of the foreground branches, is shown in Figure S3.
